# Supplementary material for: Utilization of ripe coconut water in the development of probiotic gelatin
Source: PeerJ. 2024 Jun 28;12:e17502. doi: 10.7717/peerj.17502 (PMC11216217; doi:10.7717/peerj.17502)
Supplement: Supplemental Information 1 [file peerj-12-17502-s001.xlsx]

## Sheet: Planilha1
D0	colony count	potency	Log	average	standard deviation
-6	17	17000000	7.23045	7.31548	0.0931075
-6	20	20000000	7.30103
-6	26	26000000	7.41497
-7	5	50000000	7.69897	7.49237	0.199408
-7	3	30000000	7.47712
-7	2	20000000	7.30103
D1	colony count	potency	Log	average	standard deviation
-6	49	49000000	7.6902	7.73394	0.0386399
-6	56	56000000	7.74819
-6	58	58000000	7.76343
-7	5	50000000	7.69897	7.81045	0.130666
-7	9	90000000	7.95424
-7	6	60000000	7.77815
D7	colony count	potency	Log	average	standard deviation
-6	597	597000000	8.77597	8.67024	0.0946814
-6	438	438000000	8.64147
-6	392	392000000	8.59329
-7	53	870000000	8.93952	8.91857	0.0296222
-7	79	790000000	8.89763
-7	61	610000000	8.78533
D14	colony count	potency	Log	average	standard deviation
-6	264	264000000	8.4216	8.42448	0.0591578
-6	241	241000000	8.38202
-6	295	295000000	8.46982
-7	33	330000000	8.51851	8.54746	0.0180695
-7	35	350000000	8.54407
-7	38	380000000	8.57978
D21	colony count	potency	Log	average	standard deviation
-6	330	330000000	8.51851	8.51311	0.029269
-6	363	363000000	8.55991
-6	289	289000000	8.4609
-7	29	290000000	8.4624	8.4624	0.03968
-7	33	330000000	8.51851
-7	19	190000000	8.27875
