# Supplementary material for: Utilization of ripe coconut water in the development of probiotic gelatin
Source: PeerJ. 2024 Jun 28;12:e17502. doi: 10.7717/peerj.17502 (PMC11216217; doi:10.7717/peerj.17502)
Supplement: Supplemental Information 2 [file peerj-12-17502-s002.xlsx]

## Sheet: Planilha1
period (days)	spent volume of NaOH (O,1N)	sample weight (g)	g acid latico /100g	average	standard deviation
day 0-01	1.9	10.143	0.17743	0.154034	0.0269843
day 0-02	1.7	10.054	0.160158
day 0-03	1.4	10.65	0.124514
day 1-01	1.5	10.34	0.137408	0.157095	0.0174322
day 1-02	1.8	10.44	0.16331
day 1-03	1.9	10.551	0.170569
day 7-01	4.6	10.73	0.406067	0.433796	0.0242514
day 7-02	5	10.66	0.444276
day 7-03	5	10.5	0.451046
Day 14-01	5.5	10.72	0.485968	0.488586	0.0103433
Day 14-02	5.8	11.45	0.479802
Day 14-03	5.4	10.23	0.499986
Day 21-01	7.1	10.77	0.624428	0.640182	0.0136768
Day 21-02	6.9	10.07	0.649022
Day 21-03	6.9	10.1	0.647094
	NaOH correction factor:
1.05244
