# Supplementary material for: Utilization of ripe coconut water in the development of probiotic gelatin
Source: PeerJ. 2024 Jun 28;12:e17502. doi: 10.7717/peerj.17502 (PMC11216217; doi:10.7717/peerj.17502)
Supplement: Supplemental Information 3 [file peerj-12-17502-s003.xlsx]

## Sheet: Planilha1
	moisture							ashes
	sample weight	capsule	final weight		final media	standard deviation		sample weight	capsule	final weight		final media	standard deviation
1	2.053	41.351	41.6461	14.3741			1	2.053	41.351	41.3621	0.540672
2	2.018	48.048	48.3594	15.4311	85.2049	0.560353	2	2.018	48.048	48.0588	0.535183	0.548451	0.0184326
3	2.072	41.405	41.7071	14.5801			3	2.072	41.405	41.4168	0.569498
