# Supplementary material for: Utilization of ripe coconut water in the development of probiotic gelatin
Source: PeerJ. 2024 Jun 28;12:e17502. doi: 10.7717/peerj.17502 (PMC11216217; doi:10.7717/peerj.17502)
Supplement: Supplemental Information 4 [file peerj-12-17502-s004.xlsx]

## Sheet: Planilha1
		proteins
	sample weight	volume of hydrochloric acid spent	after calculation	final media	standard deviation
1	0.2536	0.0015	4.5821
2	0.2401	0.0015	4.8397	4.8892	0.334607
3	0.2053	0.0014	5.2458
Fator hydrochloric acid: 0,9996		0.94859
N (hydrochloric acid):		0.1
nitrogen conversion factor		6.38
white	0.1
